# Supplementary material for: Evaluation analysis of electromagnetic wave absorption for self-assembled 3D graphene skeleton-supported BN/SiC composites
Source: Royal Society of Chemistry journal article supplement (doi:10.1039/d4tc02301c), 2024-01-01
Supplement: d4tc02301c1.pdf [file d4tc02301c1.pdf]

## Supporting Information

### Evaluation Analysis of Electromagnetic Waves Absorption for Self-Assemble 3D

### Graphene Skeleton-Supported BN/SiC Composites

Qiuqi Zhang<sup>a,b</sup>, Xiao You<sup>a\*</sup>, Huiying Ouyang<sup>a,c</sup>, Yuanhang Yang<sup>a,d</sup>, Zhenzhong Xing<sup>a,c</sup>,  
Haodong Gu<sup>a,b</sup>, Li Tian<sup>a,b</sup>, Qingliang Shan<sup>e</sup>, Xiangyu Zhang<sup>a</sup>, Jinshan Yang<sup>a\*\*</sup>, Shaoming  
Dong<sup>a,f\*\*\*</sup>

<sup>a</sup>State Key Laboratory of High Performance Ceramics & Superfine Microstructure,  
Shanghai Institute of Ceramics, Chinese Academy of Sciences, Shanghai 200050, China

<sup>b</sup>University of Chinese Academy of Sciences, Beijing 100049, China

<sup>c</sup>School of Physical Science and Technology, ShanghaiTech University, Shanghai 201210,  
China

<sup>d</sup>School of Microelectronics, Shanghai University, Shanghai 200444, China

<sup>e</sup>School of Materials Science and Engineering, Zhejiang Sci-Tech University, Hangzhou  
310018, China

<sup>f</sup>Center of Materials Science and Optoelectronics Engineering, University of Chinese  
Academy of Sciences, Beijing 100049, China

\*Corresponding authors.

E-mail addresses: youxiao@mail.sic.ac.cn (X. You); jyang@mail.sic.ac.cn (J.S. Yang);  
smdong@mail.sic.ac.cn (S.M. Dong).

---

\* Corresponding author. Tel: +86-21-69906032. Email: youxiao@mail.sic.ac.cn

\*\* Corresponding author. Tel: +86-21-69906032. Email: jyang@mail.sic.ac.cn

\*\*\* Corresponding author. Tel: +86-21-69906030. Email: smdong@mail.sic.ac.cn

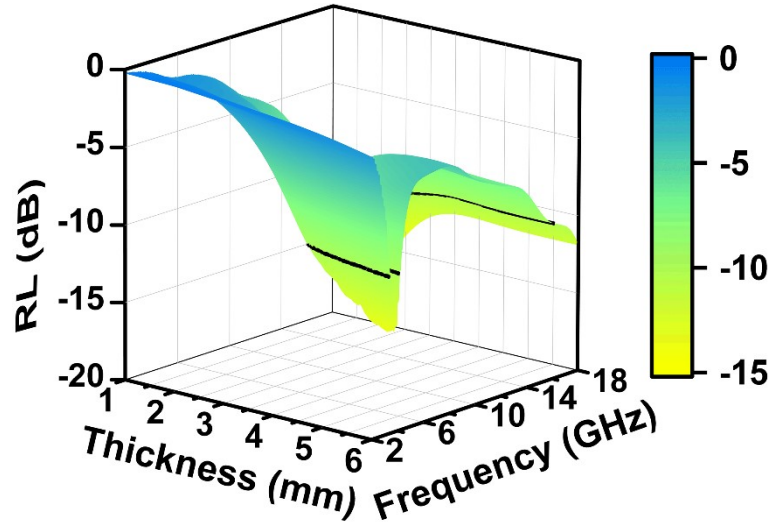

Fig. S1 The 3D reflection loss map of 3D-rGO/BN/SiC composites.

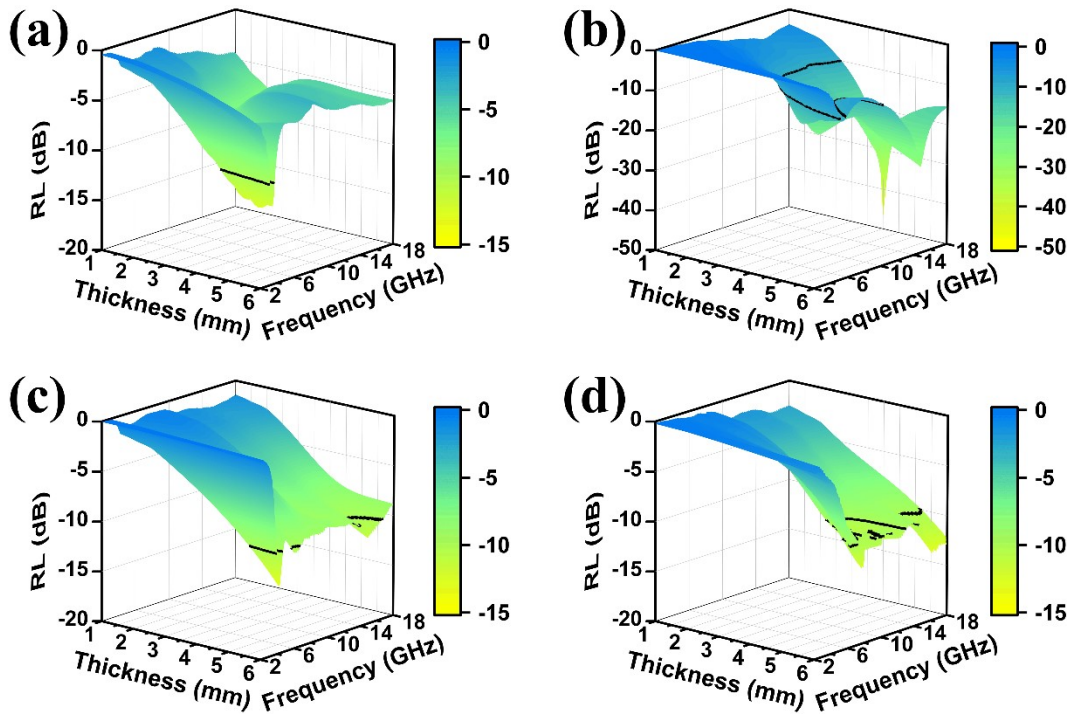

Fig. S2 The 3D reflection loss maps of 3D-rGO/BN/SiC composites after 4h oxidation under (a) 400 °C, (b) 600 °C, (c) 800 °C, and (d) 1000 °C, respectively.

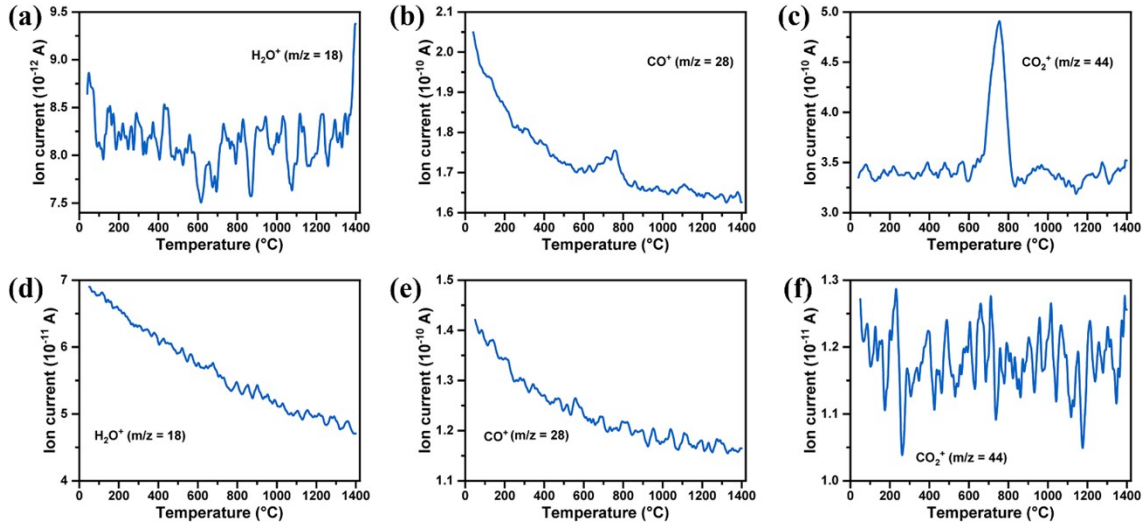

**Fig. S3** The MS curves of (a-c) 3D-rGO, and (d-f) 3D-rGO/BN/SiC during the thermogravimetric test.

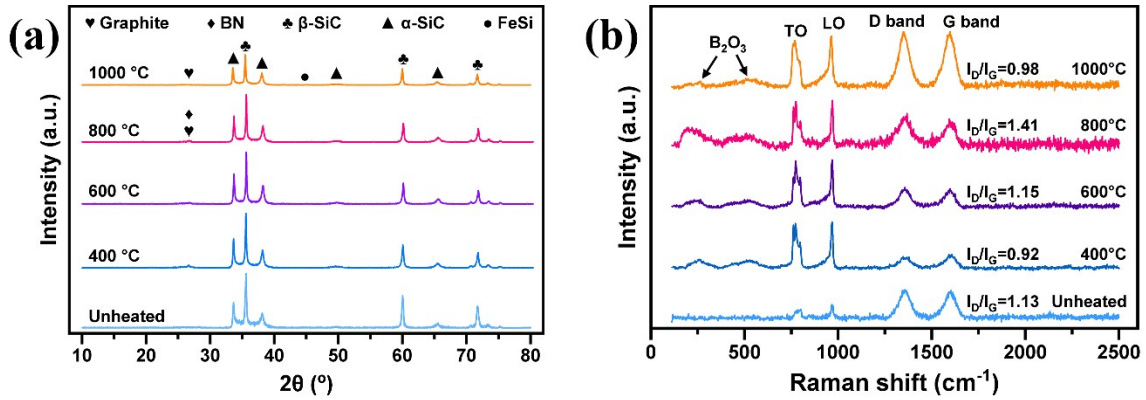

**Fig. S4** The (a) XRD and (b) Raman patterns dependent of oxidizing temperature for 3D-rGO/BN/SiC.

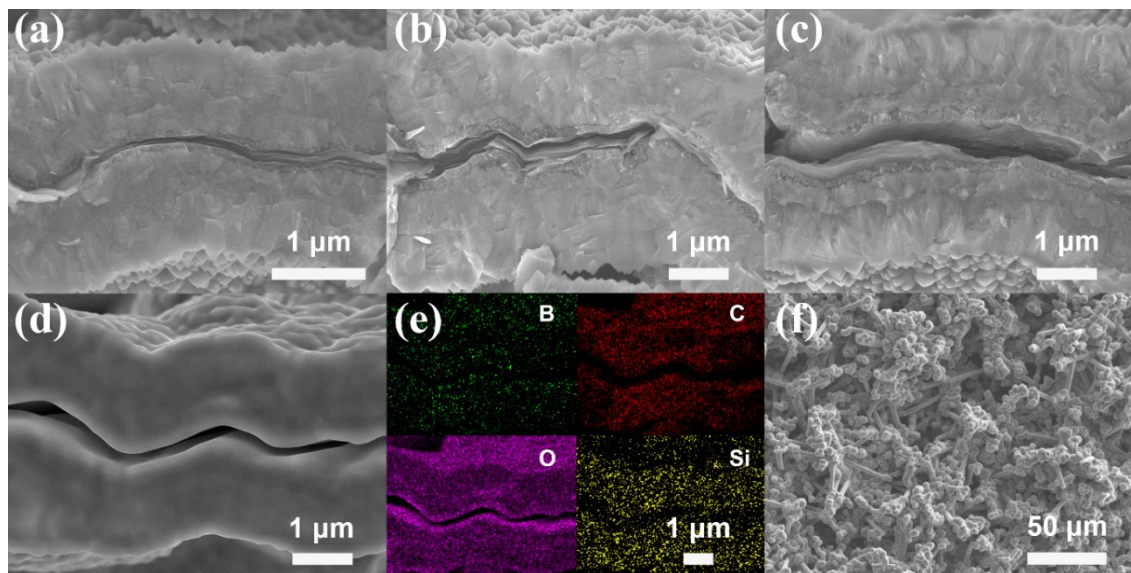

**Fig. S5** FESEM high-magnification fracture surface micrographs of 3D-rGO/BN/SiC after oxidation under (a) 400 °C, (b) 600 °C, (c) 800 °C, and (d) 1000 °C, respectively. (e) Corresponding EDS elemental maps of (d). (f) FESEM external surface micrograph of 3D-rGO/BN/SiC after oxidation under 1000 °C.
